# Supplementary material for: A crystalline Cu–Sn–S framework for high-performance lithium storage
Source: Royal Society of Chemistry journal article supplement (doi:10.1039/c5ta04699h), 2015-01-01
Supplement: c5ta04699h1.pdf [file c5ta04699h1.pdf]

## Crystalline Cu-Sn-S Framework for High Lithium Storage

Lina Nie,<sup>†‡</sup> Yu Zhang,<sup>‡</sup> Kaiqi Ye,<sup>#</sup> Jianyu Han,<sup>‡</sup> Yue Wang,<sup>#</sup> Rakesh Ganguly,<sup>§</sup>  
Yongxin Li,<sup>§</sup> Rong Xu<sup>\*‡</sup>, Qingyu Yan<sup>\*‡</sup>, Qichun Zhang<sup>\*‡§</sup>

### Supporting Information

Table S1. Crystallographic data and structure refinement for CTS

|                                                                             | CTS                                                                                            |
|-----------------------------------------------------------------------------|------------------------------------------------------------------------------------------------|
| Chemical formula                                                            | C <sub>2</sub> N <sub>2</sub> H <sub>16</sub> OCu <sub>8</sub> Sn <sub>3</sub> S <sub>12</sub> |
| Formula mass                                                                | 1349.278                                                                                       |
| Crystal system                                                              | Cubic                                                                                          |
| Space group                                                                 | <i>F</i> -43 <i>c</i>                                                                          |
| <i>a</i> (Å)                                                                | 18.040(2)                                                                                      |
| <i>b</i> (Å)                                                                | 18.040(2)                                                                                      |
| <i>c</i> (Å)                                                                | 18.040(2)                                                                                      |
| $\alpha$ (deg)                                                              | 90.00                                                                                          |
| $\beta$ (deg)                                                               | 90.00                                                                                          |
| $\gamma$ (deg)                                                              | 90.00                                                                                          |
| <i>V</i> (Å <sup>3</sup> )                                                  | 5871.0(12)                                                                                     |
| <i>Z</i>                                                                    | 4                                                                                              |
| <i>D</i> <sub>cal</sub> (g/cm <sup>3</sup> )                                | 3.116                                                                                          |
| Theta (deg)                                                                 | 3.19-27.00                                                                                     |
| GOF on <i>F</i> <sup>2</sup>                                                | 1.118                                                                                          |
| <i>R</i> <sub>1</sub> , <i>wR</i> <sub>2</sub> [ <i>I</i> > 2σ( <i>I</i> )] | 0.0374, 0.1058                                                                                 |
| <i>R</i> <sub>1</sub> , <i>wR</i> <sub>2</sub> (all data)                   | 0.0525, 0.1157                                                                                 |

$${}^a R_1 = \sum \left| |F_o| - |F_c| \right| / \sum |F_o|, \quad {}^b wR_2 = \left[ \sum w(F_o^2 - F_c^2)^2 / \sum w(F_o^2) \right]^{1/2}.$$

**Table S2. A survey of electrochemical properties of Tin-based materials for LIBs**

| Electrode description              | Cycling stability                                                                                                       | Cycling stability                                         | Ref. |
|------------------------------------|-------------------------------------------------------------------------------------------------------------------------|-----------------------------------------------------------|------|
| SnS <sub>2</sub> nanoparticles     | 293 mAh g <sup>-1</sup> after 50 cycles at 50 mA g <sup>-1</sup> (a capacity fade of 4.7 mAh g <sup>-1</sup> per cycle) | 55.6% of an initial capacity of 527 mAh g <sup>-1</sup>   | 1    |
| SnS <sub>2</sub> powder            | 400 mAh g <sup>-1</sup> after 25 cycles at 50 mA g <sup>-1</sup>                                                        | 66.6% of an initial capacity of 600 mAh g <sup>-1</sup>   | 2    |
| SnO <sub>2</sub> nanowires         | 300 mAh g <sup>-1</sup> up to the 50th cycle                                                                            | 60% of the fifth-cycle capacity                           | 3    |
| SnO <sub>2</sub> hollow structures | About 500 mAh g <sup>-1</sup> at 100 mA g <sup>-1</sup> after 40 cycles                                                 | 43.8 % of an initial capacity of 1140 mAh g <sup>-1</sup> | 4    |
| 2D-SnS <sub>2</sub> nanoplates     | 583 mAhg 100mA g <sup>-1</sup> after 30 cycles                                                                          | 85% of the 2rd-cycle capacity                             | 5    |
| SnS <sub>2</sub> nanotablets       | 168 mAh g <sup>-1</sup> at 0.5 C after 200 cycles                                                                       | 60% of the initial capacity of 1250 mAh g <sup>-1</sup>   | 6    |

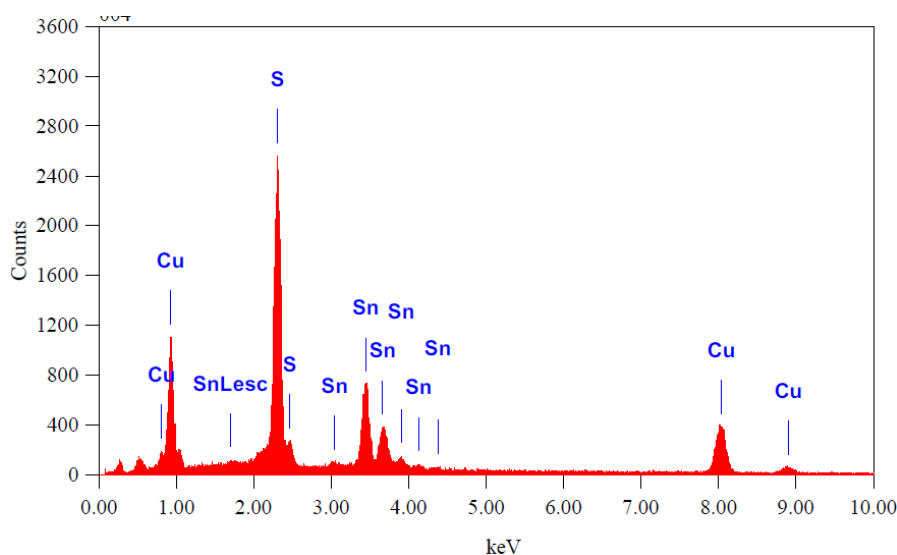

Figure S1. The energy dispersive X-ray (EDX) spectroscopy of CTS.

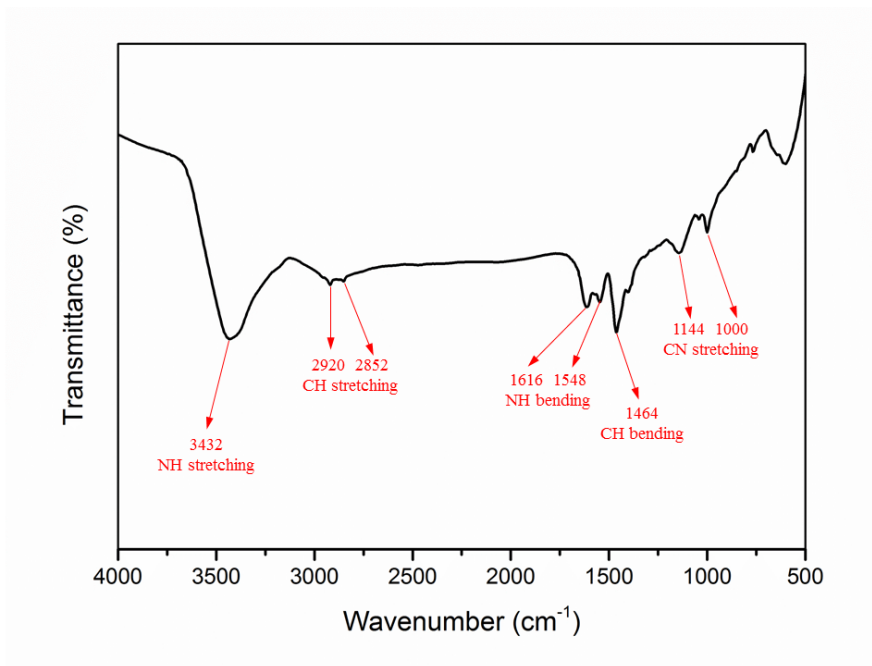

Figure S2. FTIR spectrum for CTS with the assignment of main absorption peaks.

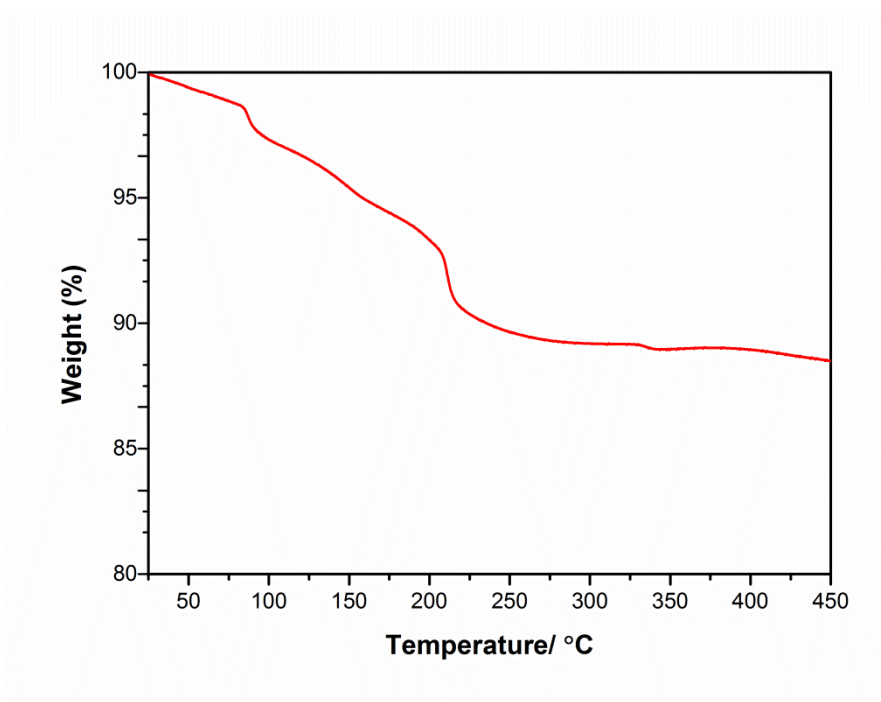

Figure S3. TGA curve for CTS.

## References

1. H. S. Kim, Y. H. Chung, S. H. Kang and Y. E. Sung, *Electrochim. Acta*, 2009, **54**, 3606-3610.
2. T. Momma, N. Shiraishi, A. Yoshizawa, T. Osaka, A. Gedanken, J. J. Zhu and L. Sominski, *J. Power Sources*, 2001, **97-8**, 198-200.
3. M. S. Park, G. X. Wang, Y. M. Kang, D. Wexler, S. X. Dou and H. K. Liu, *Angew. Chem.*, 2007, **46**, 750-753.
4. J. S. Chen, L. A. Archer and X. W. Lou, *J. Mater. Chem.*, 2011, **21**, 9912-9924.
5. J. W. Seo, J. T. Jang, S. W. Park, C. J. Kim, B. W. Park and J. W. Cheon, *Adv. Mater.*, 2008, **20**, 4269-4273.
6. Z. F. Jiang, C. Wang, G. H. Du, Y. J. Zhong and J. Z. Jiang, *J. Mater. Chem.*, 2012, **22**, 9494-9496.
